# Supplementary material
Source: PubMed Central journal article supplement (PMC2563071)
Supplement: 0807419105_0807419105SI.pdf [file 0807419105_0807419105SI.pdf]

# Supporting Information

Beers et al. 10.1073/pnas.0807419105

## SI Materials and Methods

**SOD1<sup>G93A</sup> Mice.** All transgenic animals were bred and maintained in our animal facility (1, 2). All mice were housed in microisolator cages within a modified pathogen-free barrier facility and had access to food and water *ad libitum*. All animal protocols were approved by the Methodist Research Institute's Institutional Animal Care and Use Committee in compliance with National Institutes of Health guidelines. Genomic tail DNA was isolated using a standard protocol.

Transgenic mice overexpressing the fALS associated G93A SOD1 mutation (G1H) (mSOD1<sup>G93A</sup>) were originally purchased from Jackson Laboratories (Bar Harbor, ME); strain designations were as follows: B6SJL-Tg(SOD1\*G93A)1Gur/J and B6.Cg-Tg(SOD1\*G93A)1Gur/J. mSOD1<sup>G93A</sup> mice on a B6/SJL genetic background had a mean survival time of 132 days, whereas mSOD1<sup>G93A</sup> mice on a C57BL/6 genetic background survived for 160 days. Transgenic mSOD1<sup>G93A</sup> animals were identified and copy number verified by quantitative PCR using the antisense and sense SOD1 oligonucleotides 5'-AATTTGTGTCTACTCAGTCAA-3' and 5'-TCACTTTGATTGTTAGTCGCG-3', respectively. The PCR conditions for genomic tail DNA in a 50- $\mu$ l reaction using an Eppendorf Mastercycler gradient thermocycler (Westbury, NY) were as follows: 2 min at 94°C; then 35 cycles of 20 sec at 94°C, 20 sec at 60°C, and 30 sec at 72°C; then 2 min at 72°C and held at 4°C until the samples were run on a 1% agarose gel in 1X TAE buffer. All transgenic mice were housed in microisolator cages within a modified pathogen-free barrier facility and had access to food and water *ad libitum*. PU.1<sup>-/-</sup> mice were bred with B6SJL-Tg(SOD1\*G93A)1Gur/J, and RAG2<sup>-/-</sup> and CD4<sup>-/-</sup> mice were bred with B6.Cg-Tg(SOD1\*G93A)1Gur/J.

**PU.1 Mice.** To prevent the possibility of graft-versus-host disease and/or alterations of onset and survival times resulting from differing genetic backgrounds, PU.1 heterozygous (PU.1<sup>+/-</sup>) mice were first backcrossed with B6/SJL mice for 10 generations. PU.1<sup>+/-</sup> mice were then mated with mSOD1<sup>G93A</sup> mice to produce PU.1<sup>+/-</sup> and mSOD1<sup>G93A</sup>/PU.1<sup>+/-</sup> mice (2, 3). Finally, breeding mSOD1<sup>G93A</sup>/PU.1<sup>+/-</sup> with PU.1<sup>+/-</sup> generated PU.1<sup>-/-</sup> and mSOD1<sup>G93A</sup>/PU.1<sup>-/-</sup> mice. Within 12 h of birth, PU.1 litters were injected with antibiotic (Baytril, Bayer HealthCare). Giemsa staining was used to identify the PU.1<sup>-/-</sup> pups from a drop of tail blood smeared onto a glass slide and dried for 10 min at room temperature (RT). The Giemsa stain (Sigma) covered the blood smear and incubated for 5 min at RT. Phosphate-buffered saline (PBS) was added to the slide just to cover and incubated for 10 min at RT. The slides are briefly washed and dehydrated in 70% ethanol. The slides were then air dried and cover slipped using glycerol and were immediately examined. The presence or absence of the PU.1 gene was then confirmed by PCR (Eppendorf Mastercycler) using 250 ng tail DNA and using Eppendorf TaqDNA polymerase according to the manufacturer's instructions. The following primers were used: A) forward PUKO, 5'-GCCCGGATGTGCTTCCCTTATCAAACC-3'; B) reverse 920, 5'-TGCCTCGGC-CCTGGGAATGTC-3'; C) reverse 0.Neo.1, 5'-CGCACGGGTGTTGGGTGCTTTGTTGG-3'. The A and B primers were used to identify mice with the WT PU.1 gene, and the A and C primers were used to identify mice with the PU.1 deletion. The PCR protocol was as follows: 92°C for 2 min; [denatured at 92°C for 1 min, annealed at 65°C for 2 min, and extended at 72°C for 3 min] for 45 cycles; then 72°C for 7 min, and finally held at 4°C. The PCR products

were resolved by 1.0% agarose/ethidium bromide gel electrophoresis and photographed under UV illumination. PU.1<sup>-/-</sup> mice received daily antibiotic injections for the first 3 weeks after birth. PU.1<sup>-/-</sup>, PU.1<sup>+/-</sup>, and WT mice were weighed and observed for signs of motoneuron disease daily. Transgenic mSOD1<sup>G93A</sup> mice animals were identified by quantitative PCR to ensure mSOD1<sup>G93A</sup> transgene copy numbers remain stable.

**RAG2 Mice.** RAG2<sup>-/-</sup> mice were initially bred with B6.Cg-Tg(SOD1\*G93A)1Gur/J for at least eight generations. The presence or absence of the RAG2 gene was determined by PCR (Eppendorf Mastercycler) using 250 ng of tail DNA and using Eppendorf TaqDNA polymerase according to the manufacturer's instruction. The following primers were used: Rag A) 5'-GGGAGGACTCACTTGC-CAG-3' and Rag B) 5'-AGTCAGGAGTCTCCATCTCAC-3' and Neo C) 5'-CGCGCGG-GAGAACCTGCGTGCAA-3'. Homozygotic mice will have one 350 bp band. Heterozygotic mice will have 350 and 263 bp bands. Wild-type mice will have one 263 bp band. The PCR protocol was: 95°C for 15 min (denatured at 94°C for 45 sec, annealed at 55°C for 1 min, and extended at 72°C for 1 min) for 35 cycles, then 72°C for 7 min, and finally held at 4°C. The PCR products were resolved by 1.0% agarose/ethidium bromide gel electrophoresis and photographed under UV illumination. Transgenic mSOD1<sup>G93A</sup> mice animals were identified by quantitative PCR to ensure mSOD1<sup>G93A</sup> transgene copy numbers remain stable. After the initial cross, mSOD1<sup>G93A</sup>/RAG2<sup>+/-</sup> mice were bred with RAG2<sup>-/-</sup> mice that enabled a direct comparison of mSOD1<sup>G93A</sup>/RAG2<sup>-/-</sup> mice with their mSOD1<sup>G93A</sup>/RAG2<sup>+/-</sup> littermates.

**CD4 Mice.** CD4<sup>-/-</sup> mice were initially bred with B6.Cg-Tg(SOD1\*G93A)1Gur/J for at least 8 generations. The presence or absence of the CD4 gene was also determined by PCR (Eppendorf Mastercycler) using 250 ng of tail DNA and using Eppendorf TaqDNA polymerase according to the manufacturer's instruction. The following primers were used: CD4 A) 5'-CCTCTTGGTTAATGGGGG-AT-3' and CD4 B) 5'-TTTTTCTGGTCCAGGGTCCAC-3' and CD4 C) 5'-GTGTTGGG-TCGTTTGTTCG-3'. Knockout mice will have one band 225 bp; heterozygotic mice will have bands 380 and 225 bp; and wild-type mice will have one band 380 bp. The PCR protocol was as follows: 94°C for 3 min; [denatured at 94°C for 30 sec, annealed at 57°C for 1 min, and extended at 72°C for 1 min] for 35 cycles; then 72°C for 2 min, and finally held at 4°C. The PCR products are resolved by 1.0% agarose/ethidium bromide gel electrophoresis and photographed under UV illumination. Transgenic mSOD1<sup>G93A</sup> mice animals were identified by quantitative PCR to ensure mSOD1<sup>G93A</sup> transgene copy numbers remain stable. After the initial cross, mSOD1<sup>G93A</sup>/CD4<sup>+/-</sup> mice were bred with CD4<sup>-/-</sup> mice to enable a direct comparison of mSOD1<sup>G93A</sup>/CD4<sup>-/-</sup> mice with their mSOD1<sup>G93A</sup>/CD4<sup>+/-</sup> littermates.

**Bone Marrow Transplantation.** The donor bone marrow was obtained from 9- to 12-week-old WT, mSOD1<sup>G93A</sup>, or CCR2<sup>-/-</sup> mice and was transplanted into the mSOD1<sup>G93A</sup>/PU.1<sup>-/-</sup> pups within 24 h of birth, as previously described (1). mSOD1<sup>G93A</sup>/RAG2<sup>-/-</sup> mice were sublethally  $\gamma$ -irradiated (400 rads) and transplanted with WT, mSOD1<sup>G93A</sup>, or RAG2<sup>-/-</sup> donor-derived bone marrow. Briefly, the donor mice were lethally anesthetized and their femurs removed under sterile conditions. The bone







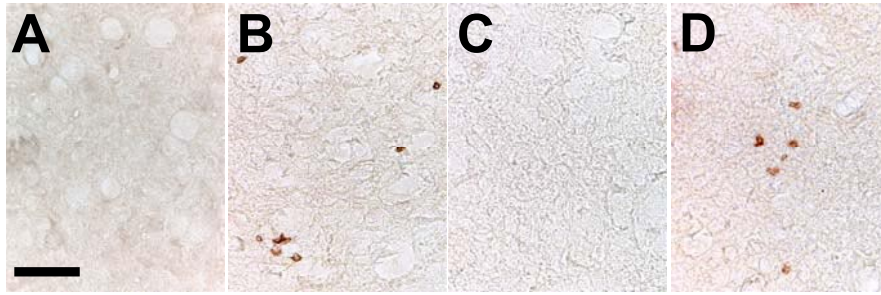

**Fig. S3.** CD3+ T-cells were documented at end-stage disease in mSOD1<sup>G93A</sup>/RAG2<sup>+/-</sup> mice were absent in mSOD1<sup>G93A</sup>/RAG2<sup>-/-</sup> mice (A). CD8+ T cells are observed in lumbar spinal cord sections of end-stage disease mSOD1<sup>G93A</sup>/RAG2<sup>+/-</sup> mice (B), absent in sections from mSOD1<sup>G93A</sup>/RAG2<sup>-/-</sup> mice (C), but were observed in mSOD1<sup>G93A</sup>/RAG2<sup>-/-</sup> mice receiving BMT (D).







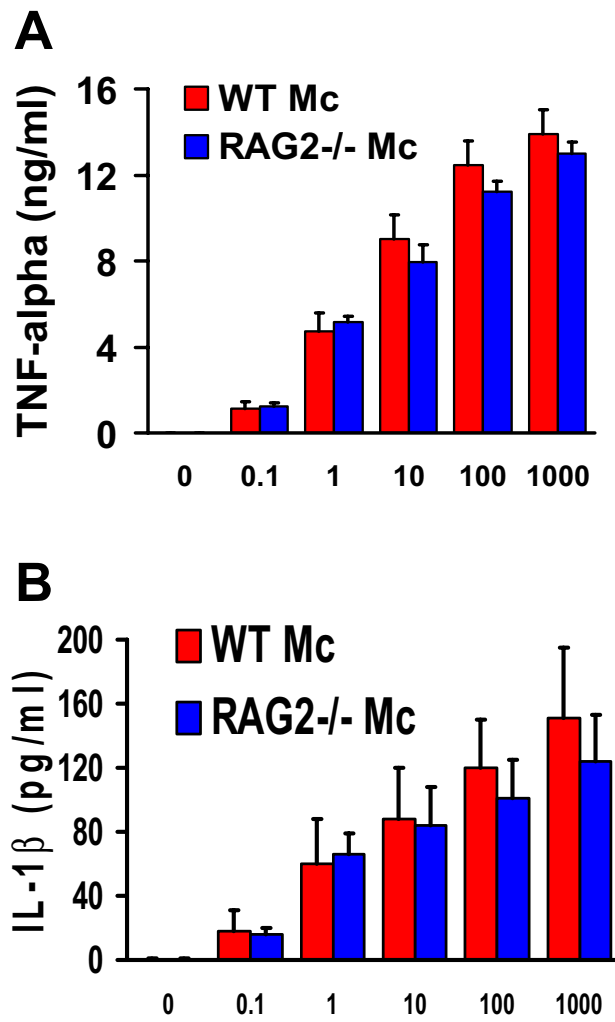

**Fig. S6.** Characterization of microglia *in vitro*. TNF- $\alpha$  (A) or IL-1 $\beta$  (B) released in cultures of primary microglia with and without LPS treatment. No differences were observed between RAG2<sup>-/-</sup> and WT microglia at any dose of LPS.



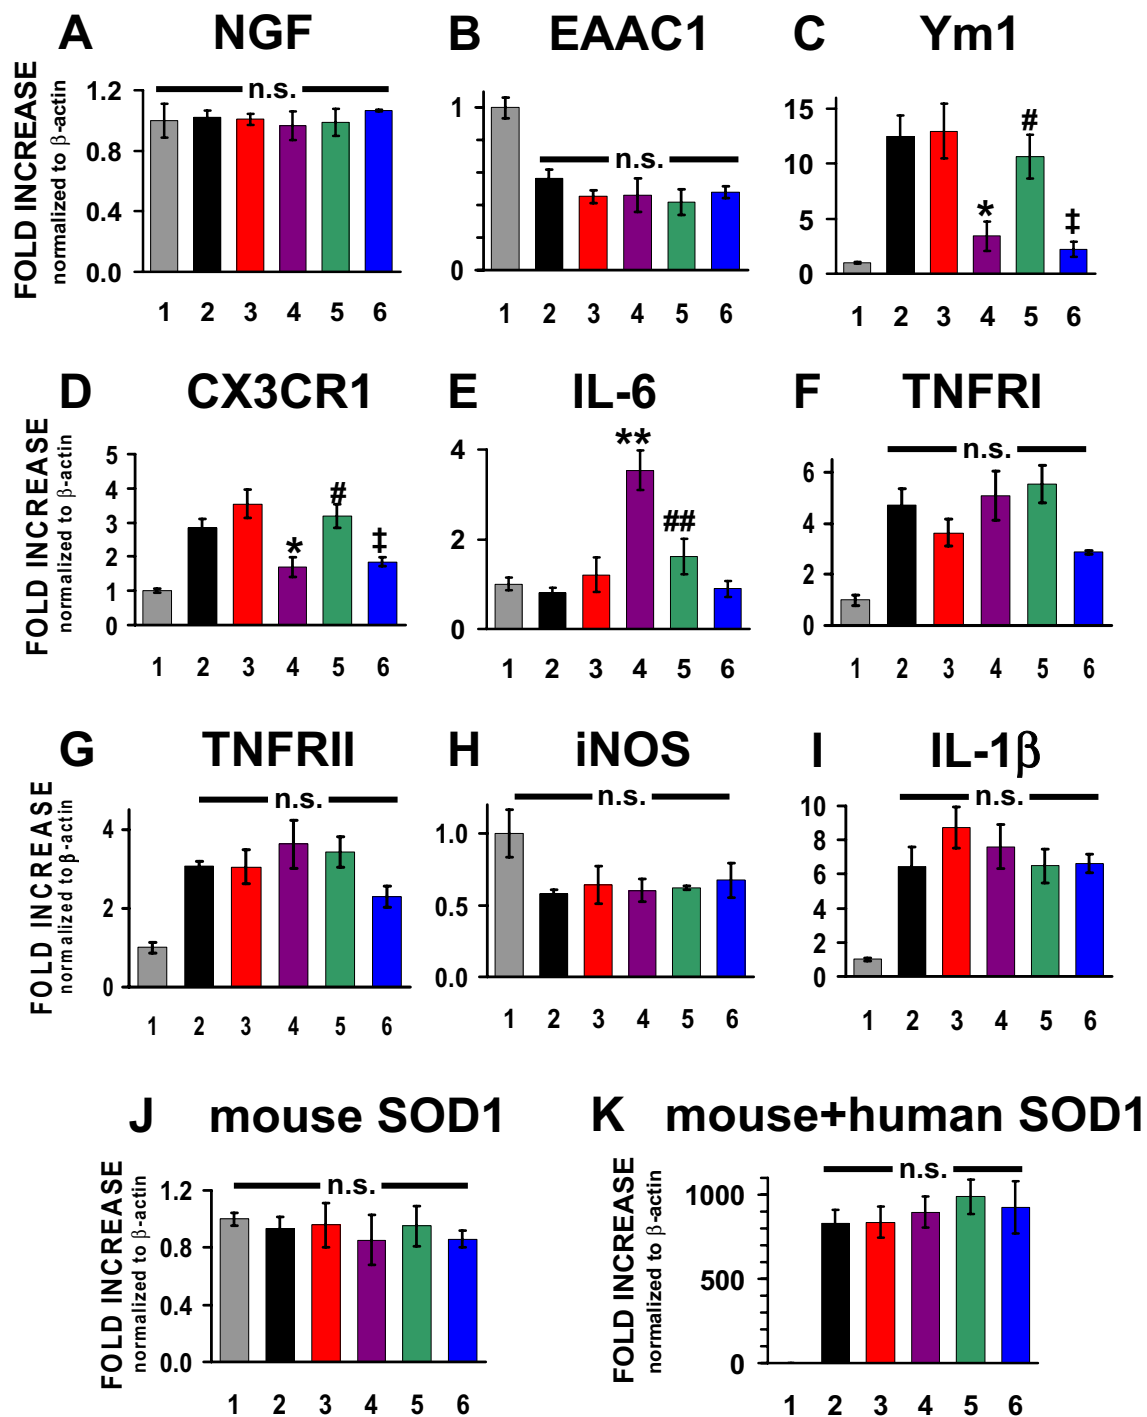

**Fig. S7.** Quantitative RT-PCR. Note the different ordinate for each graph. (A) There was no difference in message levels for NGF. (B) EAAC1/EAAT3 was reduced in all mSOD1<sup>G93A</sup> genotypes compared with WT mice. (C) Ym1 mirrored the IL-4 results across all genotypes of mSOD1<sup>G93A</sup> mice studied. (D) CX3CR1 (fractalkine receptor) was reduced in mSOD1<sup>G93A</sup>/RAG2<sup>-/-</sup> mice compared with mSOD1<sup>G93A</sup>/RAG2<sup>+/-</sup> mice, but was restored following BMT. mSOD1<sup>G93A</sup>/CD4<sup>-/-</sup> mice also had a reduced mRNA level for CX3CR1. (E) IL-6 was increased in mSOD1<sup>G93A</sup>/RAG2<sup>-/-</sup> mice. (F and G) TNF-α receptors I and II were elevated compared with WT mice, but were not different between all genotypes of mSOD1<sup>G93A</sup> mice. (H) iNOS was not different between WT mice and any mSOD1<sup>G93A</sup> genotypes. (I) IL-1β was elevated compared with WT mice, but were not different between all genotypes of mSOD1<sup>G93A</sup> mice. (J) Mouse SOD1 was not different in any genotype. (K) Mouse + human SOD1 was elevated in all genotypes of mSOD1<sup>G93A</sup> mice compared with WT mice. 1, WT mice; 2, mSOD1<sup>G93A</sup> mice; 3, mSOD1<sup>G93A</sup>/RAG2<sup>+/-</sup> mice; 4, mSOD1<sup>G93A</sup>/RAG2<sup>-/-</sup> mice; 5, mSOD1<sup>G93A</sup>/RAG2<sup>-/-</sup> mice + BMT; and 6, mSOD1<sup>G93A</sup>/CD4<sup>-/-</sup> mice. *n* = 3 for all groups of mice. n.s., not significant. \*, Decreased compared with mSOD1<sup>G93A</sup> or mSOD1<sup>G93A</sup>/RAG2<sup>+/-</sup> mice, *P* < 0.05; #, not different from mSOD1<sup>G93A</sup>/RAG2<sup>+/-</sup> mice; ‡, not different from mSOD1<sup>G93A</sup>/RAG2<sup>-/-</sup> mice; \*\*, increased compared with mSOD1<sup>G93A</sup> or mSOD1<sup>G93A</sup>/RAG2<sup>+/-</sup> mice, *P* < 0.05; ##, decreased compared with mSOD1<sup>G93A</sup>/RAG2<sup>-/-</sup> mice, *P* < 0.05.
